# Supplementary material for: Wnt/β-catenin Signaling Pathway Regulates Specific lncRNAs That Impact Dermal Fibroblasts and Skin Fibrosis
Source: PubMed Central journal article supplement (PMC5702388; doi:10.3389/fgene.2017.00183), 2017-11-21

**A****Color Key  
and Histogram**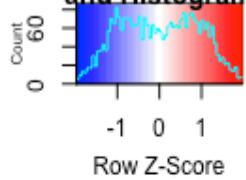**CTL vs. GOF IncRNAs**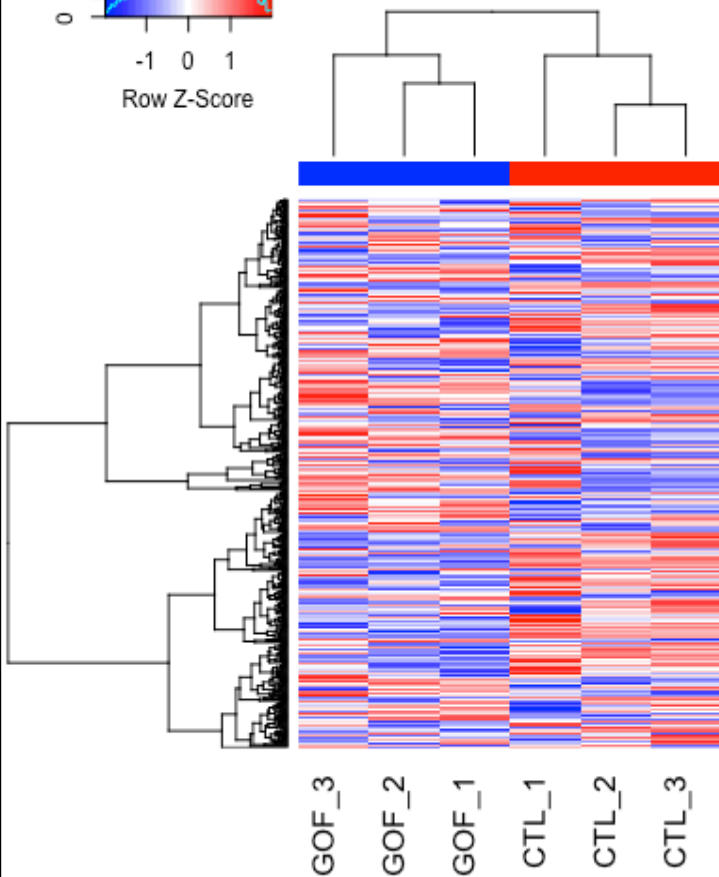**B****Color Key  
and Histogram**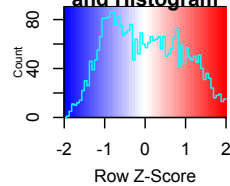**CTL vs. GOF mRNAs**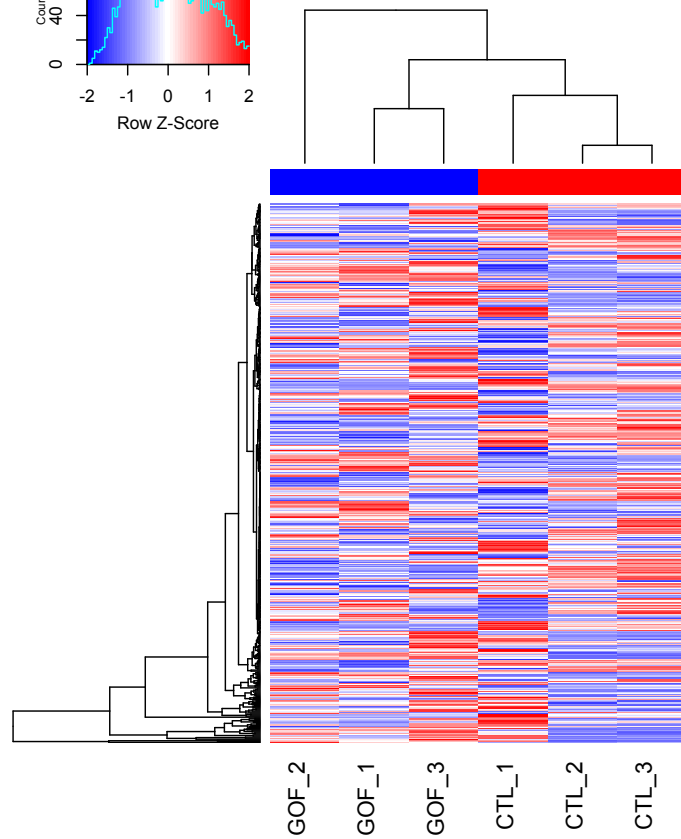

Supplement: Image_1.pdf [file Image_1.pdf]
